# Supplementary material for: Impact of Partitioning in Short-Term Food Contact Applications Focused on Polymers in Support of Migration Modelling and Exposure Risk Assessment
Source: MDPI journal article supplement (doi:10.3390/molecules27010121), 2021-12-26
Supplement: s1 [file s1]

## Supplementary data

# Impact of partitioning in short-term food contact applications focused on polymers in support of migration modelling and exposure risk assessment

Rainer Brandsch <sup>1</sup>, Mark Pemberton <sup>2</sup>, Dieter Schuster <sup>1</sup>, Frank Welle <sup>3,\*</sup>

<sup>1</sup> SAFE+ Algorithmics GmbH, Untere Läng 8c, 82205 Gilching, Germany; rainer.brandsch@saferithm.com, dieter.schuster@saferithm.com

<sup>2</sup> Systox Limited, Sutton Grange, Parvey Lane, Sutton, Cheshire, SK11 0HX, United Kingdom; markpemberton@systox.com

<sup>3</sup> Fraunhofer Institute for Process Engineering and Packaging (IVV), Giggenhauser Straße 35, 85354 Freising, Germany; welle@ivv.fraunhofer.de

\* Correspondence: welle@ivv.fraunhofer.de

### 1. Generic Diffusion Coefficient Approach

Figure S1 to Figure S3 shows the predicted migration in dependence of diffusion coefficients  $D_P$  ranging from  $10^{-10}$  cm<sup>2</sup>/s to  $10^{-15}$  cm<sup>2</sup>/s and partition coefficients ranges  $K_{P,F}$  = 0.1 to 10000 for several thicknesses of the packaging material (100 µm, 200 µm and 1000 µm) with an initial concentration  $c_{P,0}$  = 100 mg/kg in the material. The surface volume ratio was set  $V$  = 1000 ml and  $A$  = 600 cm<sup>2</sup>.

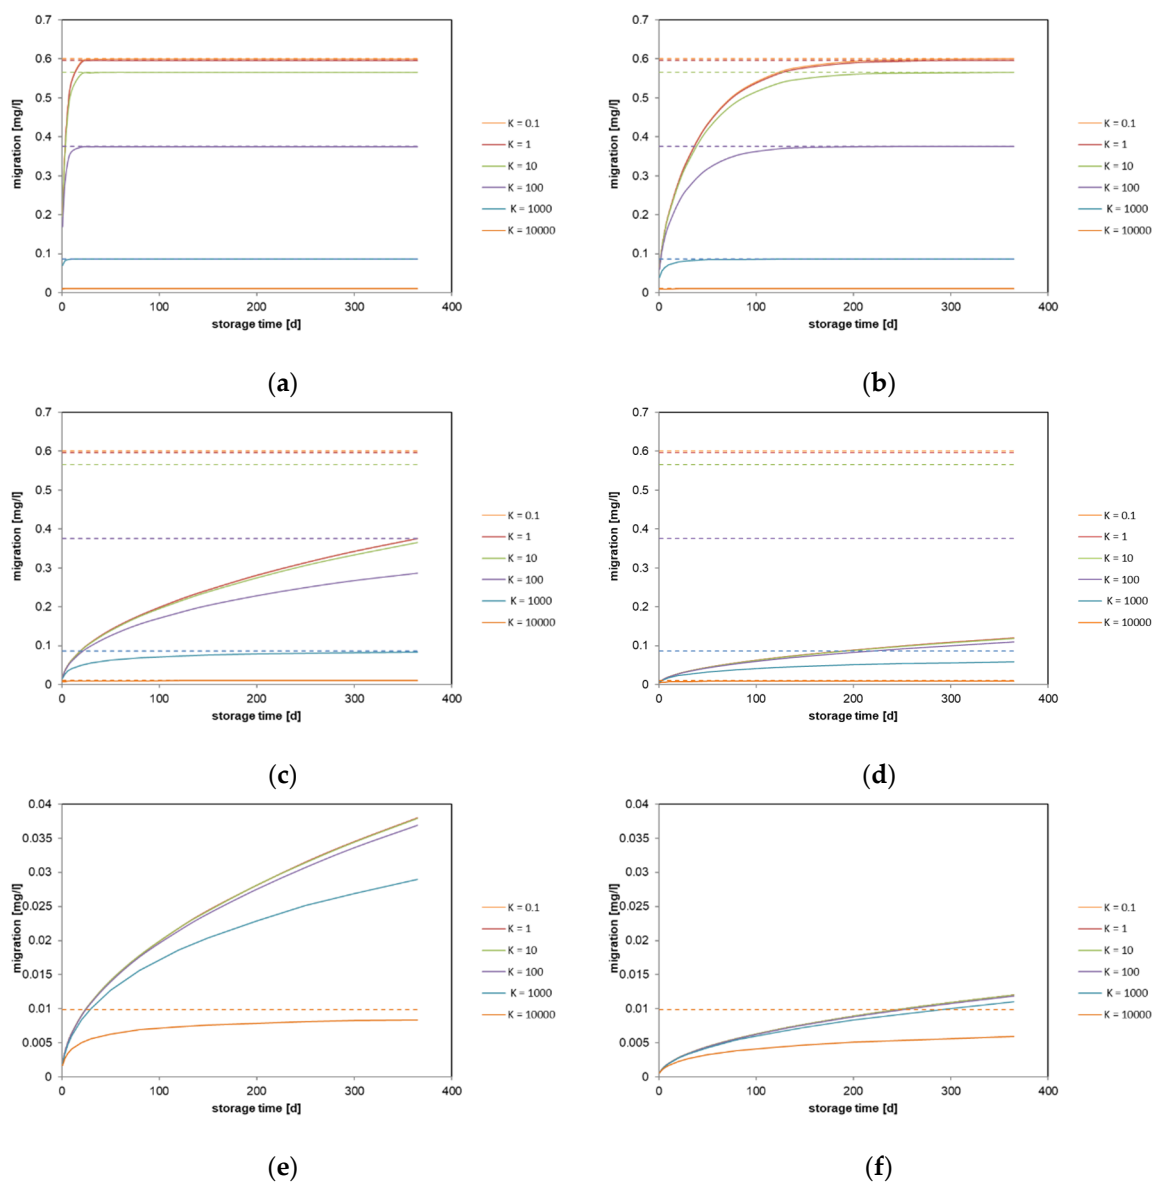

**Figure S1.** Calculated migration into food considering different partition coefficients: (a) diffusion coefficient  $DP = 1 \times 10^{-10}$  cm<sup>2</sup>/s, (b)  $DP = 1 \times 10^{-11}$  cm<sup>2</sup>/s, (c)  $DP = 1 \times 10^{-12}$  cm<sup>2</sup>/s, (d)  $DP = 1 \times 10^{-13}$  cm<sup>2</sup>/s, (e)  $DP = 1 \times 10^{-14}$  cm<sup>2</sup>/s and (f)  $DP = 1 \times 10^{-15}$  cm<sup>2</sup>/s. Calculated for a layer thickness of  $d = 100$   $\mu$ m,  $cP,0 = 100$  mg/kg,  $V = 1000$  mL,  $A = 600$  cm<sup>2</sup>. Note: (e) and (f) different scale on y-axis.

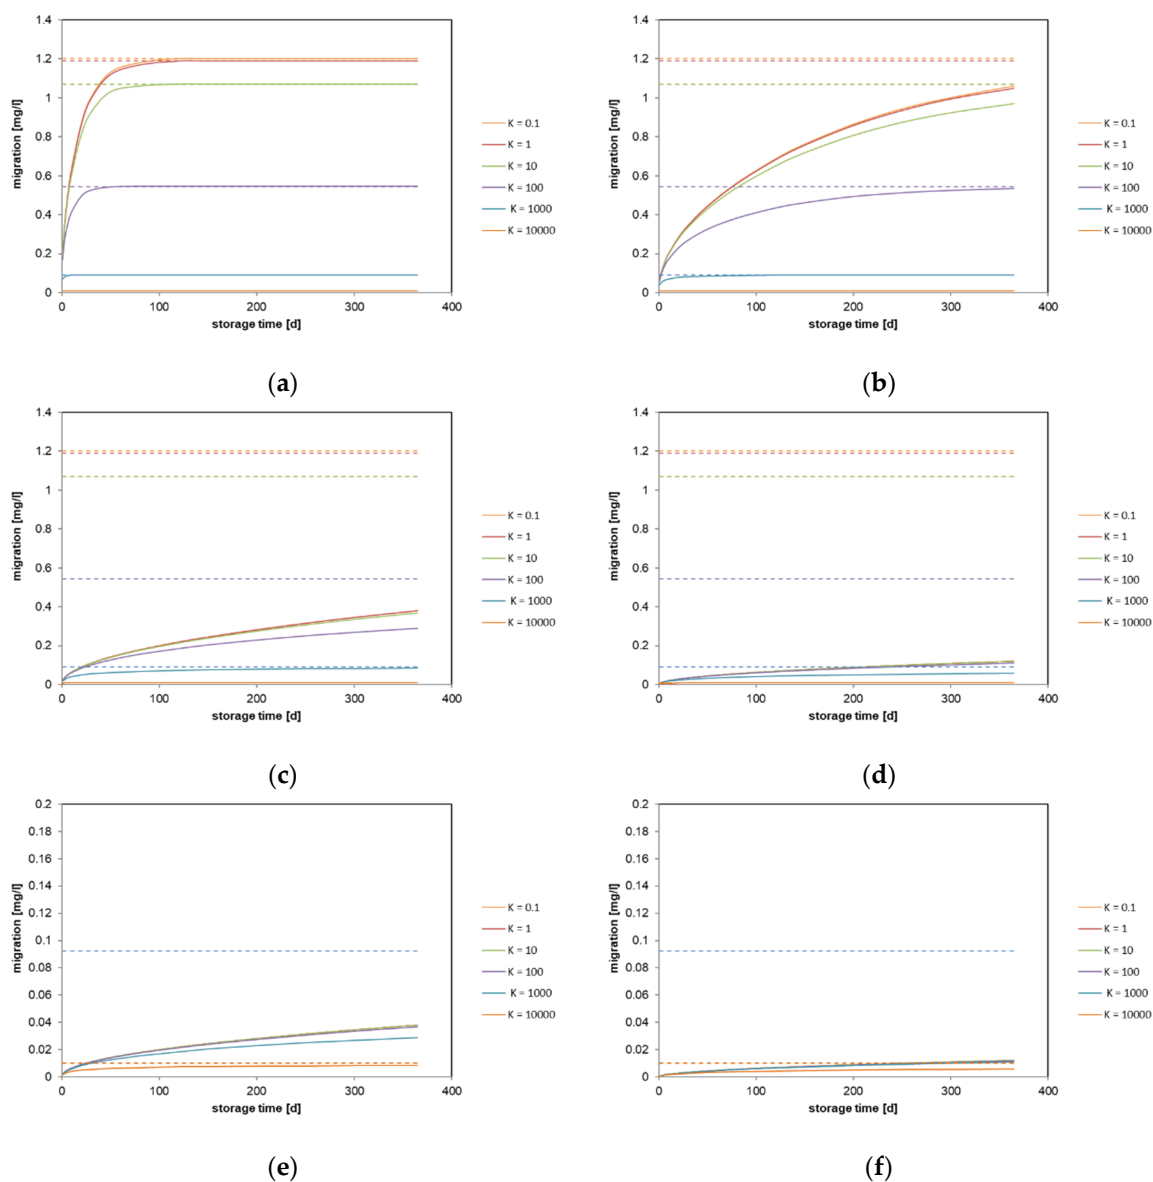

**Figure S2.** Calculated migration into food considering different partition coefficients: (a) diffusion coefficient  $DP = 1 \times 10^{-10} \text{ cm}^2/\text{s}$ , (b)  $DP = 1 \times 10^{-11} \text{ cm}^2/\text{s}$ , (c)  $DP = 1 \times 10^{-12} \text{ cm}^2/\text{s}$ , (d)  $DP = 1 \times 10^{-13} \text{ cm}^2/\text{s}$ , (e)  $DP = 1 \times 10^{-14} \text{ cm}^2/\text{s}$  and (f)  $DP = 1 \times 10^{-15} \text{ cm}^2/\text{s}$ . Calculated for a layer thickness of  $d = 200 \text{ }\mu\text{m}$ ,  $cP,0 = 100 \text{ mg/kg}$ ,  $V = 1000 \text{ mL}$ ,  $A = 600 \text{ cm}^2$ . Note: (e) and (f) different scale on y-axis.

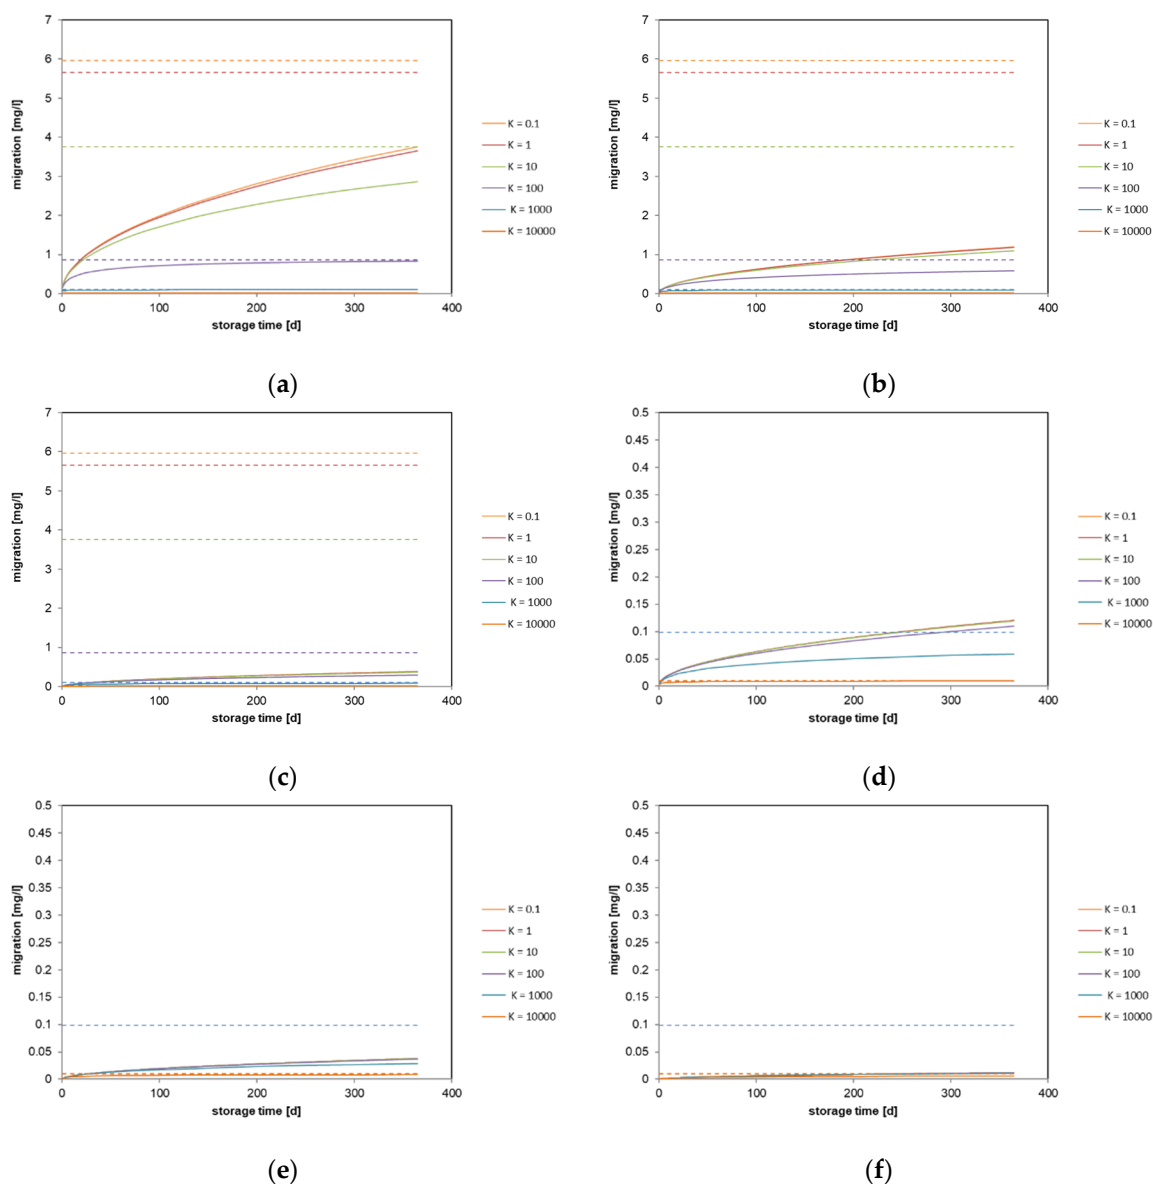

**Figure S3.** Calculated migration into food considering different partition coefficients: (a) diffusion coefficient  $DP = 1 \times 10^{-10}$  cm<sup>2</sup>/s, (b)  $DP = 1 \times 10^{-11}$  cm<sup>2</sup>/s, (c)  $DP = 1 \times 10^{-12}$  cm<sup>2</sup>/s, (d)  $DP = 1 \times 10^{-13}$  cm<sup>2</sup>/s, (e)  $DP = 1 \times 10^{-14}$  cm<sup>2</sup>/s and (f)  $DP = 1 \times 10^{-15}$  cm<sup>2</sup>/s. Calculated for a layer thickness of  $d = 1000$   $\mu$ m,  $c_{P,0} = 100$  mg/kg,  $V = 1000$  mL,  $A = 600$  cm<sup>2</sup>. Note: (e) and (f) different scale on y-axis.
